# Supplementary material for: Encapsulation of NiCo2O4 in nitrogen-doped reduced graphene oxide for sodium ion capacitors
Source: Royal Society of Chemistry journal article supplement (doi:10.1039/c8ta03411g), 2018-01-01
Supplement: c8ta03411g1.pdf [file c8ta03411g1.pdf]

## Supplementary Information

### Encapsulation of NiCo<sub>2</sub>O<sub>4</sub> in nitrogen-doped reduced graphene oxide for sodium ion capacitors

Dongfang Yang,<sup>a</sup> Qinglan Zhao,<sup>a</sup> Liqing Huang,<sup>b</sup> Binghui Xu,<sup>c</sup> Nanjundan Ashok Kumar<sup>a</sup> and X. S. Zhao<sup>a,c\*</sup>

<sup>a</sup> School of Chemical Engineering, The University of Queensland, St Lucia, Brisbane 4072, Australia.

<sup>b</sup> School of Mechanical and Mining Engineering, The University of Queensland, St Lucia, Brisbane 4072, Australia.

<sup>c</sup> Institute of Materials for Energy and Environment, Qingdao University, Qingdao 266071, China.

\*Corresponding authors E-mail: [george.zhao@uq.edu.au](mailto:george.zhao@uq.edu.au)

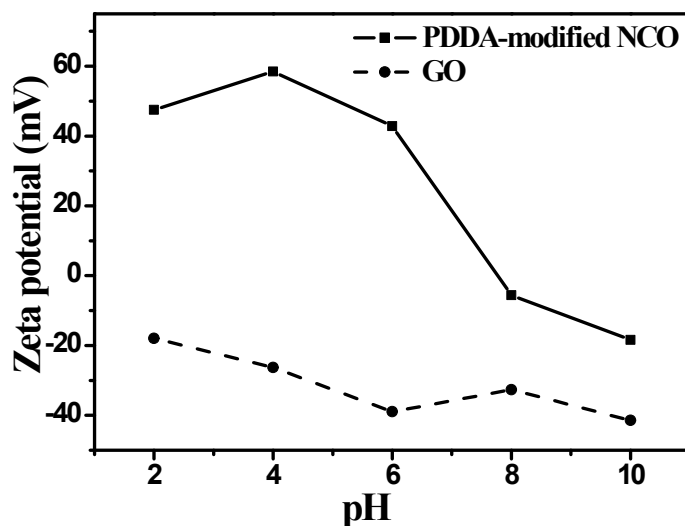

Fig. S1 Zeta potential profiles of PDDA-modified NCO and GO in the pH range between 2 and 10.

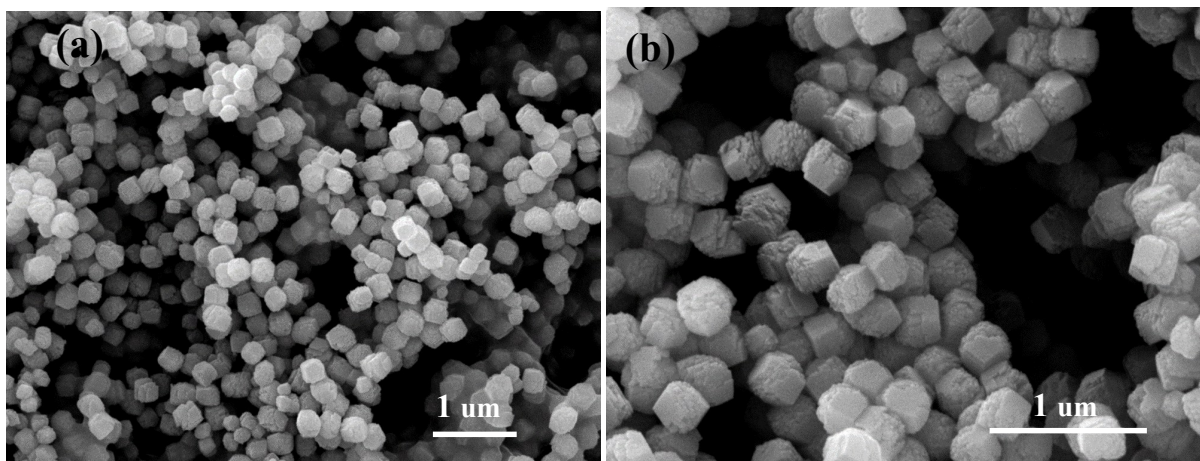

Fig. S2 SEM images of NCO particles.

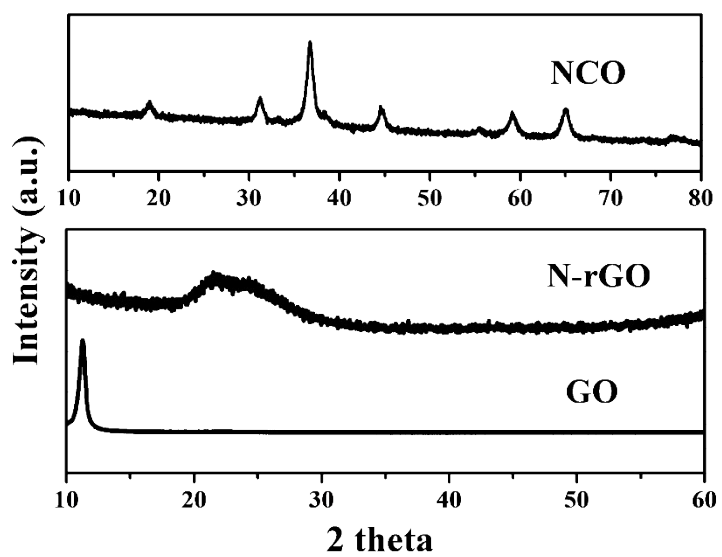

Fig. S3 XRD patterns of GO, N-rGO and NCO.

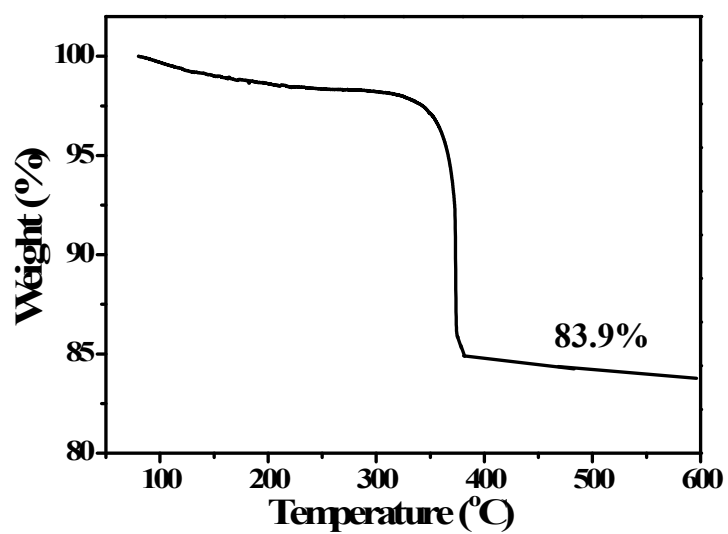

Fig. S4 Thermal gravimetric analysis (TGA) of NCO@N-rGO.

Table. S1 Fitting results of the EIS spectra in Fig. 3f using the inserted equivalent circuit.

| Circuit element       | NCO@N-rGO | NCO  |
|-----------------------|-----------|------|
| $R_c$ ( $\Omega$ )    | 5.73      | 3.80 |
| $R_{ct}$ ( $\Omega$ ) | 117       | 264  |
| $C_{ct}$ (nF)         | 690       | 902  |
| $W$ (mMho)            | 2.65      | 757  |

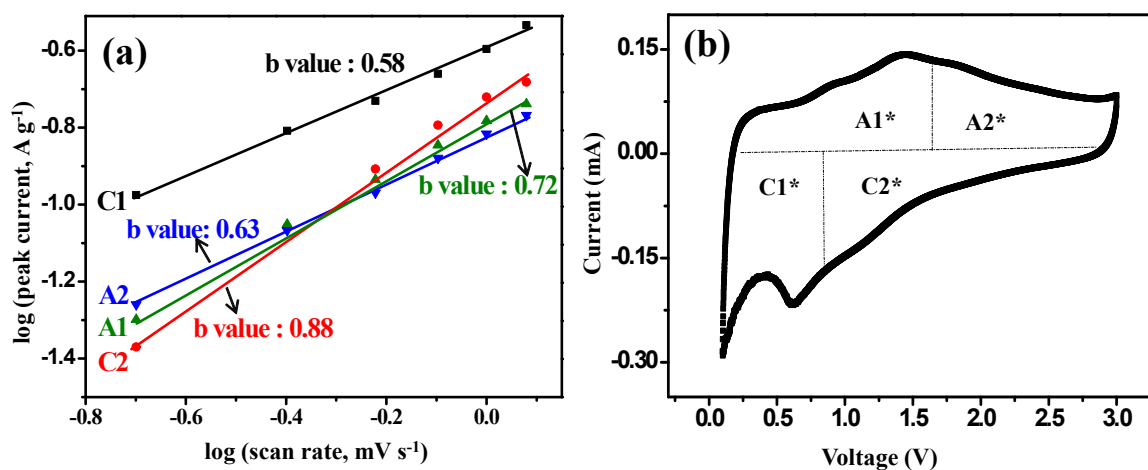

Fig. S5 (a) Peak current of NCO@N-rGO dependence on the scan rates from 0.2 to 1.2 mV s<sup>-1</sup>, used to determine the b-values. (b) The CV curve of NCO@N-rGO at 1 mV s<sup>-1</sup>, which was divided into four regions (C1\*, C2\*, A1\* and A2\*).

Table S2 Quantitative contributions of sodium ion storage via capacitive mechanism in the different regions defined in Fig. S5b.

| Scan rate<br>(mV s <sup>-1</sup> ) | A1*    | A2*    | C1*   | C2*    |
|------------------------------------|--------|--------|-------|--------|
| 0.2                                | 33.47% | 24.14% | 3.95% | 76.05% |
| 0.4                                | 41.57% | 31.03% | 5.50% | 81.79% |
| 0.6                                | 46.56% | 35.53% | 6.65% | 84.62% |
| 0.8                                | 50.16% | 38.89% | 7.60% | 86.40% |
| 1                                  | 52.94% | 41.57% | 8.42% | 87.66% |
| 1.2                                | 55.20% | 43.80% | 9.16% | 88.61% |
